# Supplementary material
Source: Springer Nature journal article supplement (https://www.springermedizin.de/resource/supplementary/12936_2009_945_MOESM7_ESM.pdf/9548594)

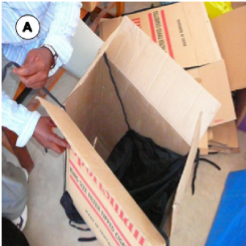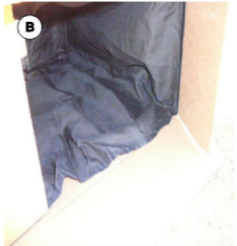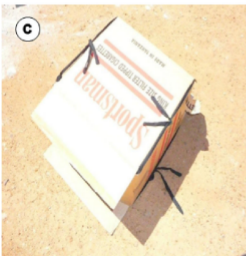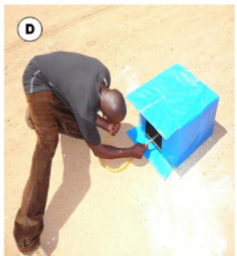

Supplement: MOESM7 [file 9548594]
